# Supplementary material for: Higher Renal Net Acid Excretion, but Not Higher Phosphate Excretion, during Childhood and Adolescence Associates with the Circulating Renal Tubular Injury Marker Interleukin-18 in Adulthood
Source: MDPI journal article supplement (doi:10.3390/ijms25031408), 2024-01-24
Supplement: s1 [file s1]

**Supplementary table S1.** Prospective relationship of biomarkers of net endogenous acid production and phosphorus intake during growth with GFR and HOMA-IR in adulthood <sup>a</sup>

|                     |                        | <b>B</b><br>(95% CI) | <b>R<sup>2</sup></b> | <b>P</b> |
|---------------------|------------------------|----------------------|----------------------|----------|
| <b>GFR</b>          |                        |                      |                      |          |
| <b>NAE-<br/>SDS</b> | Model I <sup>b</sup>   | 0.43 (-8.62, 9.48)   | 0.10                 | 0.92     |
|                     | Model II <sup>c</sup>  | -0.54 (-9.63, 8.56)  | 0.14                 | 0.91     |
|                     | Model III <sup>d</sup> | -0.51 (-9.56, 8.53)  | 0.16                 | 0.91     |
|                     |                        |                      |                      |          |
| <b>PO4-<br/>SDS</b> | Model I <sup>b</sup>   | -2.61 (-9.14, 3.92)  | 0.10                 | 0.43     |
|                     | Model II <sup>c</sup>  | -2.32 (-8.82, 4.18)  | 0.14                 | 0.48     |
|                     | Model III <sup>d</sup> | -1.91 (-8.44, 4.62)  | 0.16                 | 0.56     |
|                     |                        |                      |                      |          |
| <b>HOMA-IR</b>      |                        |                      |                      |          |
| <b>NAE-<br/>SDS</b> | Model I <sup>b</sup>   | -0.11 (-0.45, 0.23)  | 0.03                 | 0.53     |
|                     | Model II <sup>c</sup>  | -0.07 (-0.41, 0.28)  | 0.08                 | 0.70     |
|                     | Model III <sup>d</sup> | -0.06 (-0.41, 0.28)  | 0.08                 | 0.71     |
|                     |                        |                      |                      |          |
| <b>PO4-<br/>SDS</b> | Model I <sup>b</sup>   | 0.04 (-0.20, 0.28)   | 0.03                 | 0.74     |
|                     | Model II <sup>c</sup>  | 0.01 (-0.23, 0.26)   | 0.08                 | 0.91     |
|                     | Model III <sup>d</sup> | 0.01 (-0.24, 0.26)   | 0.08                 | 0.95     |
|                     |                        |                      |                      |          |

Abbreviations: NAE-SDS and PO4-SDS; individual means of standard deviation scores of children's and adolescents' 24-h net acid excretion and 24-h phosphate excretion. HOMA-IR; homeostasis model assessment-insulin resistance. GFR; glomerular Filtration rate.

<sup>a</sup> Results obtained from step-wise multi linear regression analyses.

<sup>b</sup> Model I adjusted for sex and adult age along with basic urinary excretion variables related to acid-base status: urea nitrogen and urinary pH.

<sup>c</sup> Model II adjusted for variables in model I plus adults' blood parameters: uric acid, LDL/HDL ratio, CRP, and HOMA-IR (in case of outcome GFR) or GFR (in case of outcome HOMA-IR).

<sup>d</sup> Model III adjusted for variables in model II plus circulating pro-inflammatory effect modifiers: IL-1RA, sE-Selectin, and sICAM1.
